1     **Generation of conditional auxin-inducible degron (AID) cells and tight control**  
2             **of degron-fused proteins using the degradation inhibitor auxinole**

3

4             Aisha Yesbolatova<sup>1,2</sup>, Toyoaki Natsume<sup>1,2</sup>, Ken-ichiro Hayashi<sup>3</sup>  
5                             and Masato T. Kanemaki<sup>1,2</sup>

6     1. Department of Chromosome Science, National Institute of Genetics, Research  
7     Organization of Information and Systems (ROIS), Yata 1111, Mishima, Shizuoka  
8     411-8540, Japan

9     2. Department of Genetics, The Graduate University for Advanced Studies  
10    (SOKENDAI), Yata 1111, Mishima, Shizuoka 411-8540, Japan

11    3. Department of Biochemistry, Okayama University of Science, Okayama 700-0005,  
12    Japan

13

14    All correspondence should be addressed to:

15    Masato T. Kanemaki, PhD

16    E-mail: [mkanemak@nig.ac.jp](mailto:mkanemak@nig.ac.jp)

17    Phone: (+81) 55 981 5830

18    ORCID: <https://orcid.org/0000-0002-7657-1649>

19

20    Keywords: degron, protein degradation, auxin, genome editing, conditional mutant,  
21    degradation inhibitor

22

23 **Abstract**

24           Controlling protein expression using a degron is advantageous because the  
25 protein of interest can be rapidly depleted in a reversible manner. We pioneered the  
26 development of the auxin-inducible degron (AID) technology by transplanting a plant-  
27 specific degradation pathway to non-plant cells. In human cells expressing an E3  
28 ligase component, OsTIR1, it is possible to degrade a degron-fused protein with a  
29 half-life of 15–45 min in the presence of the phytohormone auxin. We reported  
30 previously the generation of human HCT116 mutants in which the C terminus of  
31 endogenous proteins was fused with the degron by CRISPR–Cas9-based knock-in.  
32 Here, we show new plasmids for N-terminal tagging and describe a detailed protocol  
33 for the generation of AID mutants of human HCT116 and DLD1 cells. Moreover, we  
34 report the use of an OsTIR1 inhibitor, auxinole, to suppress leaky degradation of  
35 degron-fused proteins. The addition of auxinole is also useful for rapid re-expression  
36 after depletion of degron-fused proteins. These improvements enhance the utility of  
37 AID technology for studying protein function in living human cells.

38

## 39 1. Introduction

40 Conditional depletion of a protein of interest (POI) is a powerful approach to  
41 analyse its function *in vivo*, especially for POIs that are essential for cell viability.  
42 Recently, conditional approaches using a degron have been drawing increased  
43 attention [1]. A degron-fused protein can be rapidly and efficiently degraded when  
44 needed, so that the primary defect arising from the depletion can be observed before  
45 the phenotype is complicated or compromised by secondary defects. For this  
46 purpose, we pioneered the establishment of the auxin-inducible degron (AID)  
47 technology to control degron-fused proteins in yeast and mammalian cells (**Figure**  
48 **1A**) [2]. When expressed in non-plant cells, TIR1 of rice (OsTIR1) forms a complex  
49 with the endogenous SCF (Skp1–Cul1–F box) components. The SCF–OsTIR1 E3  
50 ubiquitin ligase is only activated when IAA or NAA (a natural or synthetic auxin,  
51 respectively) is bound (**Figure 1A**). We identified a 7 kD degron termed mini-AID  
52 (mAID) and others identified similar AID degrons (**Supplementary Figure 1**) [3-5]. A  
53 POI fused with an mAID is recognized by SCF–OsTIR1 for ubiquitylation and  
54 subsequent proteasomal degradation (**Figure 1A**).

55 Recently, we showed that conditional human cells can be generated by  
56 tagging endogenous genes with an mAID cassette using CRISPR–Cas9-based gene  
57 tagging [6]. This technology has recently been applied in many studies. One  
58 particular example is the assessment of chromosome architectures [7-10]. Moreover,  
59 the AID technology has been applied to other model organisms, such as fission  
60 yeast, fruit fly, nematode, zebrafish and the parasitic *Toxoplasma gondii* [11-15].  
61 These studies support the idea that the AID technology can be used as a standard  
62 method to achieve conditional protein depletion. However, a drawback of this  
63 technology is the reduced expression level of mAID-fused target proteins in OsTIR1-

64 expressing cells [6]. This “basal degradation” might be caused by the presence of  
65 contaminating auxin-like chemicals in bovine serum or culture media [1]. To achieve  
66 tight control of the expression of mAID-fused proteins, an improvement in this  
67 technology would be useful.

68 Here, we describe a method to generate conditional human HCT116 and  
69 DLD1 mutants by homology-directed repair (HDR)-mediated gene tagging using  
70 CRISPR–Cas9 (**Figure 1B**). We offer a new series of plasmids for N- or C-terminal  
71 tagging with mAID and other tags. To overcome the problems associated with basal  
72 degradation, we used a TIR1 inhibitor called auxinole [16]. It was possible to  
73 suppress basal degradation and rapidly recover expression after depletion by  
74 supplementing culture media with auxinole.

75

## 76 **2. Construction of CRISPR and donor plasmids for tagging**

77 Figure 1B shows the procedures that were used to generate conditional AID  
78 cells, which typically require one month of work. We previously reported mAID  
79 tagging at the C terminus of a POI (**Figure 2A**) [6]. We now developed a procedure  
80 to tag a POI with mAID at the N terminus (**Figure 2B**) [17]. We offer C- or N-terminal  
81 tagging plasmids with mAID or other tags at Addgene  
82 ([https://www.addgene.org/Masato\\_Kanemaki/](https://www.addgene.org/Masato_Kanemaki/)) and the National Bio-resource Center  
83 (NBRP) (<http://dna.brc.riken.jp/en/gsb0000en/rdb08468>) (**Figure 2C**).

### 84 **2.1. Construction of a CRISPR–Cas9 plasmid**

85 To identify a CRISPR–Cas9 targeting site, we usually choose an appropriate  
86 sequence within 50 bp upstream or downstream from the ATG or stop codon. We  
87 use the following target finder sites.



88 • IDT custom Alt-R guide design:

89 [https://sg.idtdna.com/site/order/designtool/index/CRISPR\\_CUSTOM](https://sg.idtdna.com/site/order/designtool/index/CRISPR_CUSTOM)

90 • WEG CRISPR finder: <https://www.sanger.ac.uk/htgt/wge/>

91 We mainly use pX330-U6-Chimeric\_BB-CBh-hSpCas9 (Addgene #42230) to  
92 express the SpCas9 nuclease and guide RNA according to the protocol of Ran et al.  
93 [18]. However, it should be possible to use a plasmid encoding other Cas9 variants.  
94 As discussed in the next section, it is important to destroy or lose the target site  
95 within the genome by the HDR-mediated insertion of a tagging cassette.

## 96 **2.2. Construction of a donor plasmid**

97 We described previously a method to construct donor plasmids by generating  
98 homology arms (HAs) using long primers and gene synthesis [6]. A downside of this  
99 strategy is that the HAs are relatively short (up to 200 bp each) and that it can be  
100 costly. As an alternative (and economic) approach, we describe a method to clone  
101 HAs from the genomic DNA (**Figure 3**). The C- or N-terminal coding region (about  
102 1000 bp) is amplified by PCR, followed by cloning into a conventional cloning  
103 plasmid (such as pBluescript II). After confirming the sequence, a cloning site for  
104 inserting a tagging cassette with a selection marker is created by inverse PCR. The  
105 cassette is cloned at the cloning site to complete the construction of the donor  
106 plasmid, which contains the HA at both ends (about 500 bp each) (**Figure 3A and B**).  
107 Importantly, the donor plasmid has to be designed to destroy the CRISPR target site  
108 when inserted into the genome. In the case of targeting a noncoding locus, it is  
109 possible to delete part of the target sequence, unless a functional noncoding element  
110 is absent. In the case of targeting a coding locus within a gene, it is important to  
111 introduce silent mutations, to avoid re-cutting after HDR-mediated insertion. Another  
112 important point is that a cassette encoding a tag has to be cloned in frame with the

113 gene of interest, to be able to express a fusion protein. All cloning procedures can be  
114 carried out using a standard cloning method. In cases in which standard cloning  
115 using restriction enzymes and ligase is difficult, it is possible to employ a  
116 recombinase-mediated cloning method, such as In-Fusion cloning or Gibson  
117 assembly.

118 To select clones with a biallelic insertion efficiently, we transfected two donor  
119 plasmids containing a Neo or Hygro marker, respectively, for dual-antibiotic selection  
120 [6]. As an alternative approach, it is possible to generate clones with a biallelic  
121 insertion using a single donor plasmid with a single selection marker. In this case,  
122 both monoallelic and biallelic clones can be obtained.

123

### 124 **3. Transfection and colony formation**

125 We established near-diploid colon cancer cell lines, HCT116 and DLD1,  
126 constitutively or conditionally expressing OsTIR1 (CMV- or Tet-OsTIR1, respectively)  
127 by inserting the transgene at the safe AAVS1 locus [6]. These parental cell lines are  
128 available from NBRP or our laboratory upon request. Alternatively, it is possible to  
129 generate a new parental cell line. In this case, the plasmids that can be used for  
130 introducing OsTIR1 at AAVS1 are available at Addgene and NBRP (**Supplementary**  
131 **Figure 2**) [6]. A CRISPR–Cas9 plasmid for targeting the AAVS1 locus is also  
132 available from Addgene (AAVS1 T2 CRISPR in pX330: #72833).

#### 133 **3.1. Transfection**

- 134 1. Prepare a sub-confluent culture of low-passage-number HCT116 or DLD1  
135 CMV/Tet-OsTIR1 cells.
- 136 2. Collect cells by trypsinization to prepare a cell suspension. Count and dilute the  
137 cells to  $1 \times 10^5$  cells/mL. Seed 1 mL of the diluted cells per well in a 12-well plate

138 and culture the cells at 37 °C for two days. HCT116 cells are slow to attach to the  
139 bottom. We allow two days of culture before transfection.

140 3. Prepare the transfection mixture by mixing 2 µL of 200 ng/µL CRISPR–Cas9  
141 plasmid or TE (control), 2.5 µL of 200 ng/µL donor plasmid, 45.5 µL of Opti-MEM  
142 I Reduced Serum Medium (ThermoFisher Scientific, 31985062) and 4 µL of  
143 FuGENE HD Transfection Reagent (Promega, E2311), and incubate the mixture  
144 at RT for 15 min before applying to the cells.

145 4. One day after transfection, collect the cells in 1 mL of the medium after  
146 trypsinization. Depending on the efficiency of CRISPR–Cas9 and donor insertion,  
147 the number of colonies obtained will vary significantly. To pick up single colonies  
148 successfully, prepare several dilutions of transfected cells in a 10 cm dish  
149 (dilutions range from 100 to 1000 times; 100 to 10 µl of cell suspension into one  
150 10 cm dish containing 10 mL of culture medium).

### 151 **3.2. Antibiotic selection and colony formation**

152 The final concentration of antibiotics is shown below.

- 153 • Neo: 700 µg/mL of G418 Sulfate (potency-based)
- 154 • Hygro: 100 µg/mL of Hygromycin B Gold (InvivoGen, #ant-hg)
- 155 • BSD: 10 µg/mL of Blasticidin S Hydrochloride

156 If using a donor harbouring Neo, add G418 soon after plating the transfected  
157 cells. Hygromycin B Gold or Blasticidin S should be added one day after plating for  
158 cell recovery. In case of dual selection, add G418 and Hygromycin B Gold at the  
159 same time one day after plating. Replace culture media with a fresh one containing  
160 an appropriate antibiotic every 3–4 days until colonies become visible (usually 11–13  
161 days after plating).

162

## 163 **4. Colony isolation, expansion in 96-well plates and genotyping**

164 Visible colonies should form on the selection dishes after 11–13 days of  
165 culture. If the tagging worked well, you should find more colonies on the plates  
166 containing cells transfected with the CRISPR–Cas9 plasmid than in those containing  
167 cells without the CRISPR–Cas9 plasmid. Although this is a good indicator of  
168 successful tagging in many cases, gene tagging sometimes works well even if no  
169 differences in colony number are observed. We usually pick at least 32 and 16  
170 clones for single- and dual-antibiotic selection, respectively, to obtain clones  
171 harbouring the tag on both alleles.

### 172 **4.1. Colony isolation**

- 173 1. Prepare a 96-well plate containing 10  $\mu$ L of trypsin/EDTA solution in each well.
  - 174 2. Replace the culture medium in the dish with PBS.
  - 175 3. Under a stereo microscope, pick a single colony using a micropipette with the  
176 volume set at 25  $\mu$ L (Use a micropipette such as a Gilson pipetman P200.).
  - 177 4. Transfer the colony to the 96-well plate containing trypsin/EDTA for trypsinization.  
178 After transferring each set of 16 colonies, add 100  $\mu$ L of media to each well, to  
179 quench trypsin. Repeat this step to obtain a sufficient number of clones.
  - 180 5. After isolating clones, resuspend cells in the culture medium by pipetting. Culture  
181 the isolated clones for 2–3 days until most clones become confluent.
  - 182 6. Duplicate the 96-well plate after trypsinization, and culture the cells on the plates  
183 for an additional 2–3 days.
- 184 One 96-well plate will be used to prepare a frozen stock and the other will be used to  
185 prepare genomic DNA for PCR genotyping.

### 186 **4.2. Frozen mini-stock**

- 187 1. Remove the medium from one 96-well plate and wash cells once with 100  $\mu$ L of

- 188        PBS. Add 10  $\mu$ L of trypsin/EDTA and incubate at 37 °C for 3 min.
- 189    2. Resuspend cells in 50  $\mu$ L of medium and transfer them to 0.75  $\mu$ L Matrix Storage  
190        Tubes (ThermoFisher Scientific) containing 50  $\mu$ L of Bambanker DIRECT  
191        medium (Nippon Genetics, CS-06-001). Mix the cells by pipetting.
- 192    3. Close the tubes with a cap and store them at –80 °C until PCR genotyping is  
193        finished.

#### 194    **4.3. Genomic DNA preparation**

- 195    1. Remove the medium from the 96-well plate and wash cells once with 100  $\mu$ L of  
196        PBS. Add 75  $\mu$ L of the DirectPCR working solution (0.5  $\times$  DirectPCR Lysis  
197        Reagent-Cell [Viagen Biotech, 302-C] containing 0.5 mg/ml of Proteinase K).
- 198    2. Seal the plate with an aluminium seal and incubate it at 55 °C for >6 h in a  
199        rocking incubator.
- 200    3. Place the plate in a Tupperware containing wet tissue papers and float the wet  
201        chamber in a water bath at 85 °C for 1.5 h, to inactivate proteinase K.
- 202    4. Spin the plate to collect the samples and use 1  $\mu$ L for PCR genotyping.

#### 203    **4.4. Genotyping by PCR**

- 204    1. Design appropriate primers to check the insertion by PCR (**Figure 4A and B**).
- 205        We designed a primer set to detect both the wild-type (WT) and inserted alleles  
206        (primer set a), and another primer set to detect only the inserted allele (primer  
207        set b).
- 208    2. Set up a PCR reaction using Tks Gflex DNA Polymerase (Takara Bio, R060A) (1  
209         $\times$  Gflex PCR Buffer, 0.3  $\mu$ M primers and 0.4 U of Tks Gflex DNA Polymerase in a  
210        15  $\mu$ L reaction). Add 1  $\mu$ L of the genomic DNA to the 15  $\mu$ L reaction mixture. As  
211        controls, add genomic DNA extracted from the parental cells to the reaction  
212        mixture. Perform PCR (30 cycles of 98 °C for 10 s, 55 °C for 15 s and 68 °C for

213 0.5 min/kb).

214 3. Examine PCR products using agarose gel electrophoresis or the MultiNA  
215 microchip electrophoresis system (Shimadzu MCE-202) (**Figure 4C**).

216 4. Identify clones showing the expected band patterns of biallelic insertion. An  
217 example of N-terminal tagging of CENPC is shown in **Figure 4C**. Clones with  
218 biallelic insertion are highlighted by a red circle (clones 2 and 8). These clones  
219 can be checked further by genomic sequencing. Expand these clones of the  
220 mini-stock kept at  $-80^{\circ}\text{C}$ .

221

## 222 **5. Testing degradation of mAID-fused proteins**

223 If mAID-mClover or mAID-mCherry2 was fused to a POI, depletion of the  
224 mAID-fused POI upon the addition of auxin can be checked easily by flow cytometry  
225 or microscopy. If an antibody that detects the POI is available, it is possible to  
226 assess the loss of the WT protein and confirm the expression of the mAID-fused  
227 protein. Next, we describe our methods to check clones by Western blotting and flow  
228 cytometry.

### 229 **5.1. Confirmation by Western blotting**

230 1. Grow clones that have been confirmed by PCR in a 6-well plate. To prepare a  
231 control with mock treatment (DMSO), one clone should be grown in two wells.

232 Grow cells to 50% confluency.

233 2. Prepare a 500 mM stock solution of IAA in DMSO and keep aliquots at  $-20^{\circ}\text{C}$ .

234 3. If testing cells constitutively expressing OsTIR1 (CMV-OsTIR1), add IAA to one  
235 well at the final concentration of 200–500  $\mu\text{M}$ . Cells growing in the other well  
236 should be mock treated with DMSO. To test cells conditionally expressing

- 237 OsTIR1 (Tet-OsTIR1), add IAA and 0.2 µg/mL of doxycycline. Grow the treated  
238 cells for 12–24 h.
- 239 4. Collect cells by trypsinization and wash them in culture media.
- 240 5. Collect cells in a microtube and wash once with PBS.
- 241 6. Mix the cell pellet in 50 µL of RIPA buffer (25 mM Tris-HCl [pH 7.6], 150 mM  
242 NaCl, 1% NP40, 1% sodium deoxycholate and 0.1 % SDS) and incubate the tube  
243 for 30 min on ice.
- 244 7. Remove debris by centrifugation at 10000 rpm for 5 min at 4 °C. Collect the  
245 supernatant and mix with the same volume of 2 × Laemmli SDS sample buffer  
246 (Tris-HCl [pH 6.8], 4% SDS, 20% glycerol, 10% 2-mercaptoethanol and 0.004%  
247 bromophenol blue) before incubating at 95 °C for 5 min.
- 248 8. Typically, load 5 µL of the protein sample for Western blotting. Commercial  
249 antibodies are available to detect mAID and OsTIR1 (MBL M214-3 and PD048,  
250 respectively). The example of mAID-fused CENPC is shown in **Figure 4D**.

## 251 **5.2. Confirmation by flow cytometry**

- 252 1. Grow and treat cells in a 6-well plate as described in section 5.1.
- 253 2. Remove the media and wash cells once with PBS. After trypsinization, resuspend  
254 cells in media and transfer them to a microtube. Remove most of the media after  
255 spinning down cells and resuspend them in the residual medium by pipetting.
- 256 3. Resuspend the cells in 1 mL of 4% paraformaldehyde/PBS by pipetting. Incubate  
257 in the dark at 4 °C. Note that a methanol-free paraformaldehyde solution should  
258 be used to preserve the fluorescence of mClover and mCherry2.
- 259 4. Before flow cytometric analysis, wash the fixed cells once with PBS containing  
260 1% of BSA. Resuspend the washed cells in an appropriate volume of PBS  
261 containing 1% of BSA and analyse them after filtration with a strainer to remove

262 aggregation (An example of flow cytometry data is shown in **Figure 5** and **Figure**  
263 **6**).

264

## 265 **6. Suppression of degradation using auxinole**

266 We demonstrated previously that HCT116 cells in which mAID-mClover was  
267 fused to the cytoplasmic dynein heavy chain 1 (DHC1) protein showed a growth  
268 defect when OsTIR1 was expressed without IAA [6]. This was caused by partial  
269 degradation of DHC1-mAID-mClover (DHC1-mACI). We subsequently noted that, in  
270 some cases, the expression level of mAID-fused proteins was significantly reduced  
271 in cells constitutively expressing OsTIR1 (data not shown). Moreover, in some cases,  
272 we could only introduce a biallelic mAID into a POI in the conditional Tet-OsTIR1  
273 background (and not in the constitutive CMV-OsTIR1 background) [6]. These results  
274 indicated that mAID-tagged proteins could be ubiquitylated by OsTIR1 for partial  
275 degradation even without the addition of exogenous IAA.

276 We aimed to suppress this basal degradation by using a chemical antagonist  
277 of TIR1. Previously, we developed a potential TIR1 inhibitor named auxinole to  
278 control auxin signalling in plants [16]. Auxinole contains a moiety that is analogous to  
279 IAA and binds to the IAA-binding pocket of TIR1 (**Figure 5A**, shown in blue).  
280 Because of steric inhibition by the additional dimethylphenylethyl-2-oxo moiety  
281 (**Figure 5A**, shown in red), auxinole blocks the association of the degron domain of  
282 the AUX/IAA proteins. For the experiments in this work, auxinole was dissolved in  
283 DMSO to make a 200 mM stock solution, which was stored at -20 C° (commercially  
284 available from BioAcademia #30-001).

285 We initially tested whether auxinole affected the growth of HCT116 cells and  
286 found that it did not alter the cell cycle or colony formation when added up to 200  $\mu$ M



287 (data not shown). Subsequently, we tested the suppression of basal degradation  
288 using DHC1-mACI cells in the HCT116 Tet-OsTIR1 background [6]. Addition of  
289 doxycycline induced OsTIR1 expression, which caused partial depletion of DHC1-  
290 mACI and mitotic arrest in many cells, as we reported previously (**Figure 5B**) [6].  
291 This showed that OsTIR1 expression, even in the absence of auxin, induced a  
292 mitotic phenotype that was analogous to knockdown or inhibition of dynein [19, 20].  
293 The addition of auxinole together with doxycycline clearly suppressed the  
294 downregulation of DHC1-mACI and the mitotic arrest (**Figure 5B**). To test whether  
295 DHC1-mACI could be rapidly depleted, we added doxycycline with or without  
296 auxinole for 24 h. We monitored the expression levels of DHC1-mACI by flow  
297 cytometry, and found that basal degradation was mostly suppressed in the cells  
298 treated with doxycycline and auxinole (**Figure 5C**, compare the boxes shown in red).  
299 Subsequently, the culture media was replaced with fresh one containing doxycycline  
300 and IAA, but not auxinole. **Figure 5C** shows that DHC1-mACI was rapidly degraded  
301 after medium replacement and was mostly depleted within 4 h.

302 An advantage of AID technology is that the expression level of mAID-fused  
303 proteins can be reversibly controlled [2]. We expected that auxinole would be useful  
304 for re-expression after depletion, because IAA-bound OsTIR1 can remain active for a  
305 while, even after the removal of IAA from the culture medium. To test this idea, we  
306 used HCT116 CMV-OsTIR1 cells in which the cohesin subunit RAD21 was fused to  
307 mAID-mClover (RAD21-mACI) [6]. Initially, we depleted RAD21-mACI by adding IAA  
308 for 24 h (**Figure 6A**). Subsequently, we replaced the medium with fresh media with  
309 or without auxinole, and collected time-course samples to monitor the expression  
310 levels of RAD21-mACI by flow cytometry (**Figure 6B**). We found that recovery of  
311 RAD21-mACI was significantly rapid and sharp when auxinole was added, compared

312 with cells without auxinole. These results suggest that the OsTIR1 inhibitor auxinole  
313 is useful for the tight control of the expression of mAID-fused proteins in human cells.

314

## 315 **7. Conclusion**

316 We described a CRISPR–Cas9-based method that can be used to fuse  
317 endogenous POIs to mAID and other tags. We developed new plasmids for N-  
318 terminal tagging, so that it is now possible to tag the C and N termini of POIs (**Figure**  
319 **2**). To suppress basal degradation in cells expressing OsTIR1, we used the OsTIR1  
320 antagonist auxinole (**Figure 5A**). Even in the Tet-OsTIR1 background cells, it is now  
321 possible to induce rapid degradation of mAID-fused proteins by inducing OsTIR1 in  
322 the presence of auxinole (**Figure 5C**). Moreover, auxinole is useful for the re-  
323 expression of mAID-fused POIs after depletion (**Figure 6B**). The use of auxinole  
324 allows the rapid, tight and efficient control of the expression of mAID-fused POIs.  
325 Other genetic systems also enable the control of degra- or tag-fused POIs using a  
326 chemical ligand [1, 21-23]. However, to the best of our knowledge, there are no  
327 inhibitors that allow the tight control of these systems. AID technology—now  
328 combined with the degradation inducer, auxin, and the inhibitor, auxinole—will be  
329 particularly useful to dissect biological networks, such as transcriptional cascades,  
330 signal transduction, and cell-cycle control systems, in which a primary defect caused  
331 by the loss of a POI leads to secondary defects. We hope that the method described  
332 in this manuscript will enhance the utility of AID technology for functional studies of  
333 endogenous proteins in living cells.

334

## 335 **Acknowledgements**

336 We thank Venny Santosa, Akemi Mizuguchi and Tomoko Ashikawa for their  
337 support. This study was supported by JSPS KAKENHI grants 17K15068 to TN, and  
338 18H02170 and 18H04719 to MTK; and by research grants from JST A-STEP (grant  
339 number AS2915150U), the Canon Foundation, the Asahi Glass Foundation, and the  
340 Takeda Science Foundation.

341

## 342 **Figure legends**

343 **Figure 1.** Schematic illustration of the AID system. **(A)** Indole-3-acetic acid (IAA)- or  
344 1-naphthaleneacetic acid (NAA)-bound OsTIR1 associates with mini-AID (mAID) and  
345 promote ubiquitylation of the mAID-fused protein for proteasomal degradation. **(B)**  
346 The strategy used for generating conditional AID cells by tagging an endogenous  
347 POI.

348

349 **Figure 2.** Tagging of an endogenous POI using CRISPR–Cas9-based genome  
350 editing. **(A)** Fusing a tag at the C terminus of a POI. CRISPR–Cas9 generates a  
351 double-strand break (DSB) near the stop site for insertion of a donor harbouring a  
352 tag and a marker. The fusion protein and the marker will be expressed independently.  
353 **(B)** Fusing a tag at the N terminus of a POI. CRISPR–Cas9 generates a DSB near  
354 the first ATG site for insertion of a donor harbouring a marker-P2A-tag cassette. The  
355 fusion proteins will be processed at P2A to express the marker and the tag-fused  
356 POI. **(C)** List of N- and C-terminal tagging plasmids.

357

358 **Figure 3.** Schematic illustration of donor plasmid construction. **(A)** A DNA fragment  
359 containing the stop site (about 1 kb) is cloned into a cloning plasmid (such as  
360 pBluescript II). After creating a restriction enzyme site (such as BamHI) by inverse

361 PCR, a DNA fragment containing a tag and a marker is cloned into the plasmid, to  
362 generate a donor vector. **(B)** A DNA fragment containing the first ATG site (about 1  
363 kb) is cloned into a cloning plasmid (such as pBluescript II). After creating restriction  
364 enzyme sites (such as Sall and BamHI) by inverse PCR, a DNA fragment containing  
365 marker-P2A-tag is cloned into the plasmid, to generate a donor vector.

366

367 **Figure 4.** Confirmation of isolated clones. **(A)** Genotyping of C-terminally tagged  
368 alleles by PCR. The primer set (a) amplifies a smaller PCR product (1–1.5 kb) from  
369 the WT allele, while it amplifies a larger product (1–1.5 kb plus the size of the  
370 insertion) from the tagged allele. The primer set (b) generates a PCR product from  
371 the tagged allele exclusively (and not from the WT allele). Note that the primer set  
372 (a) must be designed outside of the homology arms. **(B)** Genotyping of N-terminally  
373 tagged alleles by PCR. The PCR strategy is analogous to that used to analyse C-  
374 terminal tagging. **(C)** PCR genotyping of the CENPC allele, in which a Hygro-P2A-  
375 mAID-mClover cassette was inserted at the N-terminal coding region. HCT116 CMV-  
376 OsTIR1 parental cells were used. **(D)** Confirmation of the fusion protein by WB. WT  
377 or mAID-CENPC clones in the HCT116 CMV-OsTIR1 background were treated with  
378 DMSO or 500  $\mu$ M IAA for 24 h. Anti-CENPC, anti-mAID and anti-tubulin antibodies  
379 (MBL, PD030, M214-3 and M175-3, respectively) were used for detection.

380

381 **Figure 5.** Use of auxinole to control DHC1-mAID-mClover (DHC1-mACI) Tet-OsTIR1  
382 cells. **(A)** The structure of IAA and auxinole. **(B)** Microscopic analysis of DHC1-mAC  
383 Tet-OsTIR1 cells. The cells were treated with 0.2  $\mu$ g/mL of doxycycline (Dox) or Dox  
384 with 200  $\mu$ M auxinole for 48 h before microscopy. **(C)** Flow cytometric analysis of  
385 DHC1-mAC Tet-OsTIR1 cells. The cells were treated with 0.2  $\mu$ g/mL of Dox or Dox

386 with 200  $\mu$ M auxinole for 24 h before replacing the culture medium with Dox and 500  
387  $\mu$ M IAA.

388

389 **Figure 6.** Re-expression of RAD21-mAID-mClover (RAD21-mACI). **(A)** Scheme of  
390 the experiment. The RAD21-mACI CMV-OsTIR1 cells were treated with 500  $\mu$ M IAA  
391 for 24 h before replacing the medium with fresh medium with or without 200  $\mu$ M  
392 auxinole. **(B)** Flow cytometric analysis of RAD21-mACI cells.

393

### 394 **References**

- 395 1. Natsume, T., and Kanemaki, M.T. (2017). Conditional Degrons for Controlling  
396 Protein Expression at the Protein Level. *Annu Rev Genet* *51*, 83-102.
- 397 2. Nishimura, K., Fukagawa, T., Takisawa, H., Kakimoto, T., and Kanemaki, M.  
398 (2009). An auxin-based degron system for the rapid depletion of proteins in  
399 nonplant cells. *Nat Methods* *6*, 917-922.
- 400 3. Kubota, T., Nishimura, K., Kanemaki, M.T., and Donaldson, A.D. (2013). The  
401 Elg1 replication factor C-like complex functions in PCNA unloading during  
402 DNA replication. *Mol Cell* *50*, 273-280.
- 403 4. Morawska, M., and Ulrich, H.D. (2013). An expanded tool kit for the auxin-  
404 inducible degron system in budding yeast. *Yeast* *30*, 341-351.
- 405 5. Brosh, R., Hrynyk, I., Shen, J., Waghray, A., Zheng, N., and Lemischka, I.R.  
406 (2016). A dual molecular analogue tuner for dissecting protein function in  
407 mammalian cells. *Nat Commun* *7*, 11742.
- 408 6. Natsume, T., Kiyomitsu, T., Saga, Y., and Kanemaki, M.T. (2016). Rapid  
409 Protein Depletion in Human Cells by Auxin-Inducible Degron Tagging with  
410 Short Homology Donors. *Cell Rep* *15*, 210-218.
- 411 7. Rao, S.S.P., Huang, S.C., Glenn St Hilaire, B., Engreitz, J.M., Perez, E.M.,  
412 Kieffer-Kwon, K.R., Sanborn, A.L., Johnstone, S.E., Bascom, G.D., Bochkov,  
413 I.D., et al. (2017). Cohesin Loss Eliminates All Loop Domains. *Cell* *171*, 305-  
414 320 e324.
- 415 8. Nora, E.P., Goloborodko, A., Valton, A.L., Gibcus, J.H., Uebersohn, A.,  
416 Abdennur, N., Dekker, J., Mirny, L.A., and Bruneau, B.G. (2017). Targeted  
417 Degradation of CTCF Decouples Local Insulation of Chromosome Domains  
418 from Genomic Compartmentalization. *Cell* *169*, 930-944 e922.
- 419 9. Gibcus, J.H., Samejima, K., Goloborodko, A., Samejima, I., Naumova, N.,  
420 Nuebler, J., Kanemaki, M.T., Xie, L., Paulson, J.R., Earnshaw, W.C., et al.  
421 (2018). A pathway for mitotic chromosome formation. *Science* *359*.
- 422 10. Bintu, B., Mateo, L.J., Su, J.H., Sinnott-Armstrong, N.A., Parker, M., Kinrot, S.,  
423 Yamaya, K., Boettiger, A.N., and Zhuang, X. (2018). Super-resolution  
424 chromatin tracing reveals domains and cooperative interactions in single cells.  
425 *Science* *362*.

- 426 11. Kanke, M., Nishimura, K., Kanemaki, M., Kakimoto, T., Takahashi, T.S.,  
427 Nakagawa, T., and Masukata, H. (2011). Auxin-inducible protein depletion  
428 system in fission yeast. *BMC Cell Biol* 12, 8.
- 429 12. Brown, K.M., Long, S., and Sibley, L.D. (2018). Conditional Knockdown of  
430 Proteins Using Auxin-inducible Degron (AID) Fusions in *Toxoplasma gondii*.  
431 *Bio Protoc* 8.
- 432 13. Trost, M., Blattner, A.C., and Lehner, C.F. (2016). Regulated protein depletion  
433 by the auxin-inducible degradation system in *Drosophila melanogaster*. *Fly*  
434 (Austin) 10, 35-46.
- 435 14. Zhang, L., Ward, J.D., Cheng, Z., and Dernburg, A.F. (2015). The auxin-  
436 inducible degradation (AID) system enables versatile conditional protein  
437 depletion in *C. elegans*. *Development* 142, 4374-4384.
- 438 15. Daniel, K., Icha, J., Horenburg, C., Muller, D., Norden, C., and Mansfeld, J.  
439 (2018). Conditional control of fluorescent protein degradation by an auxin-  
440 dependent nanobody. *Nat Commun* 9, 3297.
- 441 16. Hayashi, K., Neve, J., Hirose, M., Kuboki, A., Shimada, Y., Kepinski, S., and  
442 Nozaki, H. (2012). Rational design of an auxin antagonist of the SCF(TIR1)  
443 auxin receptor complex. *ACS Chem Biol* 7, 590-598.
- 444 17. Park, A., Won, S.T., Pentecost, M., Bartkowski, W., and Lee, B. (2014).  
445 CRISPR/Cas9 allows efficient and complete knock-in of a destabilization  
446 domain-tagged essential protein in a human cell line, allowing rapid  
447 knockdown of protein function. *PLoS One* 9, e95101.
- 448 18. Ran, F.A., Hsu, P.D., Wright, J., Agarwala, V., Scott, D.A., and Zhang, F.  
449 (2013). Genome engineering using the CRISPR-Cas9 system. *Nat Protoc* 8,  
450 2281-2308.
- 451 19. Firestone, A.J., Weinger, J.S., Maldonado, M., Barlan, K., Langston, L.D.,  
452 O'Donnell, M., Gelfand, V.I., Kapoor, T.M., and Chen, J.K. (2012). Small-  
453 molecule inhibitors of the AAA+ ATPase motor cytoplasmic dynein. *Nature*  
454 484, 125-129.
- 455 20. Raaijmakers, J.A., Tanenbaum, M.E., and Medema, R.H. (2013). Systematic  
456 dissection of dynein regulators in mitosis. *J Cell Biol* 201, 201-215.
- 457 21. Nabet, B., Roberts, J.M., Buckley, D.L., Paulk, J., Dastjerdi, S., Yang, A.,  
458 Leggett, A.L., Erb, M.A., Lawlor, M.A., Souza, A., et al. (2018). The dTAG  
459 system for immediate and target-specific protein degradation. *Nat Chem Biol*  
460 14, 431-441.
- 461 22. Banaszynski, L.A., Chen, L.C., Maynard-Smith, L.A., Ooi, A.G., and Wandless,  
462 T.J. (2006). A rapid, reversible, and tunable method to regulate protein  
463 function in living cells using synthetic small molecules. *Cell* 126, 995-1004.
- 464 23. Buckley, D.L., Raina, K., Darricarrere, N., Hines, J., Gustafson, J.L., Smith,  
465 I.E., Miah, A.H., Harling, J.D., and Crews, C.M. (2015). HaloPROTACS: Use  
466 of Small Molecule PROTACs to Induce Degradation of HaloTag Fusion  
467 Proteins. *ACS Chem Biol* 10, 1831-1837.
- 468

A

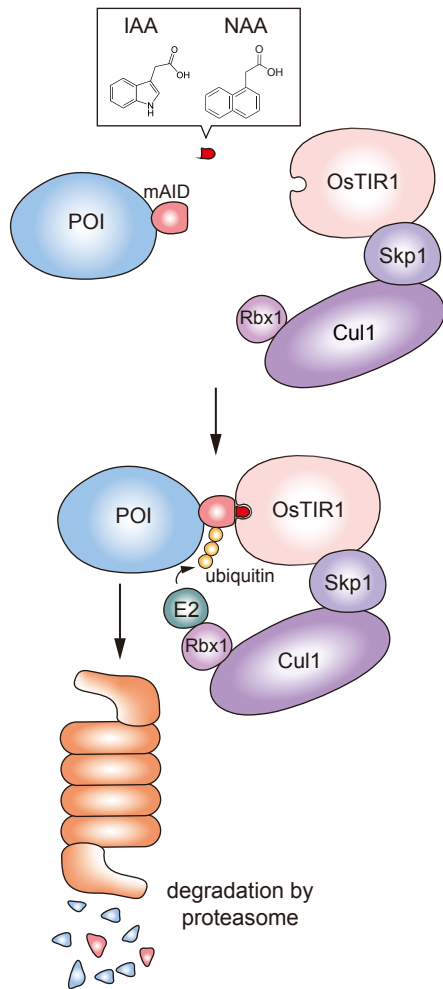

B

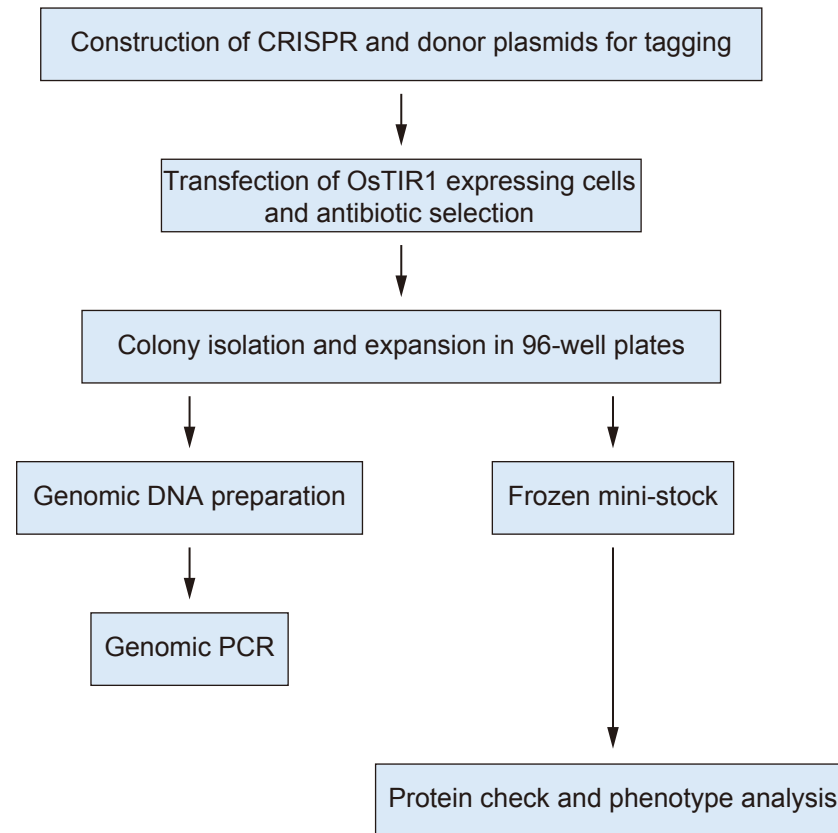

Figure 1

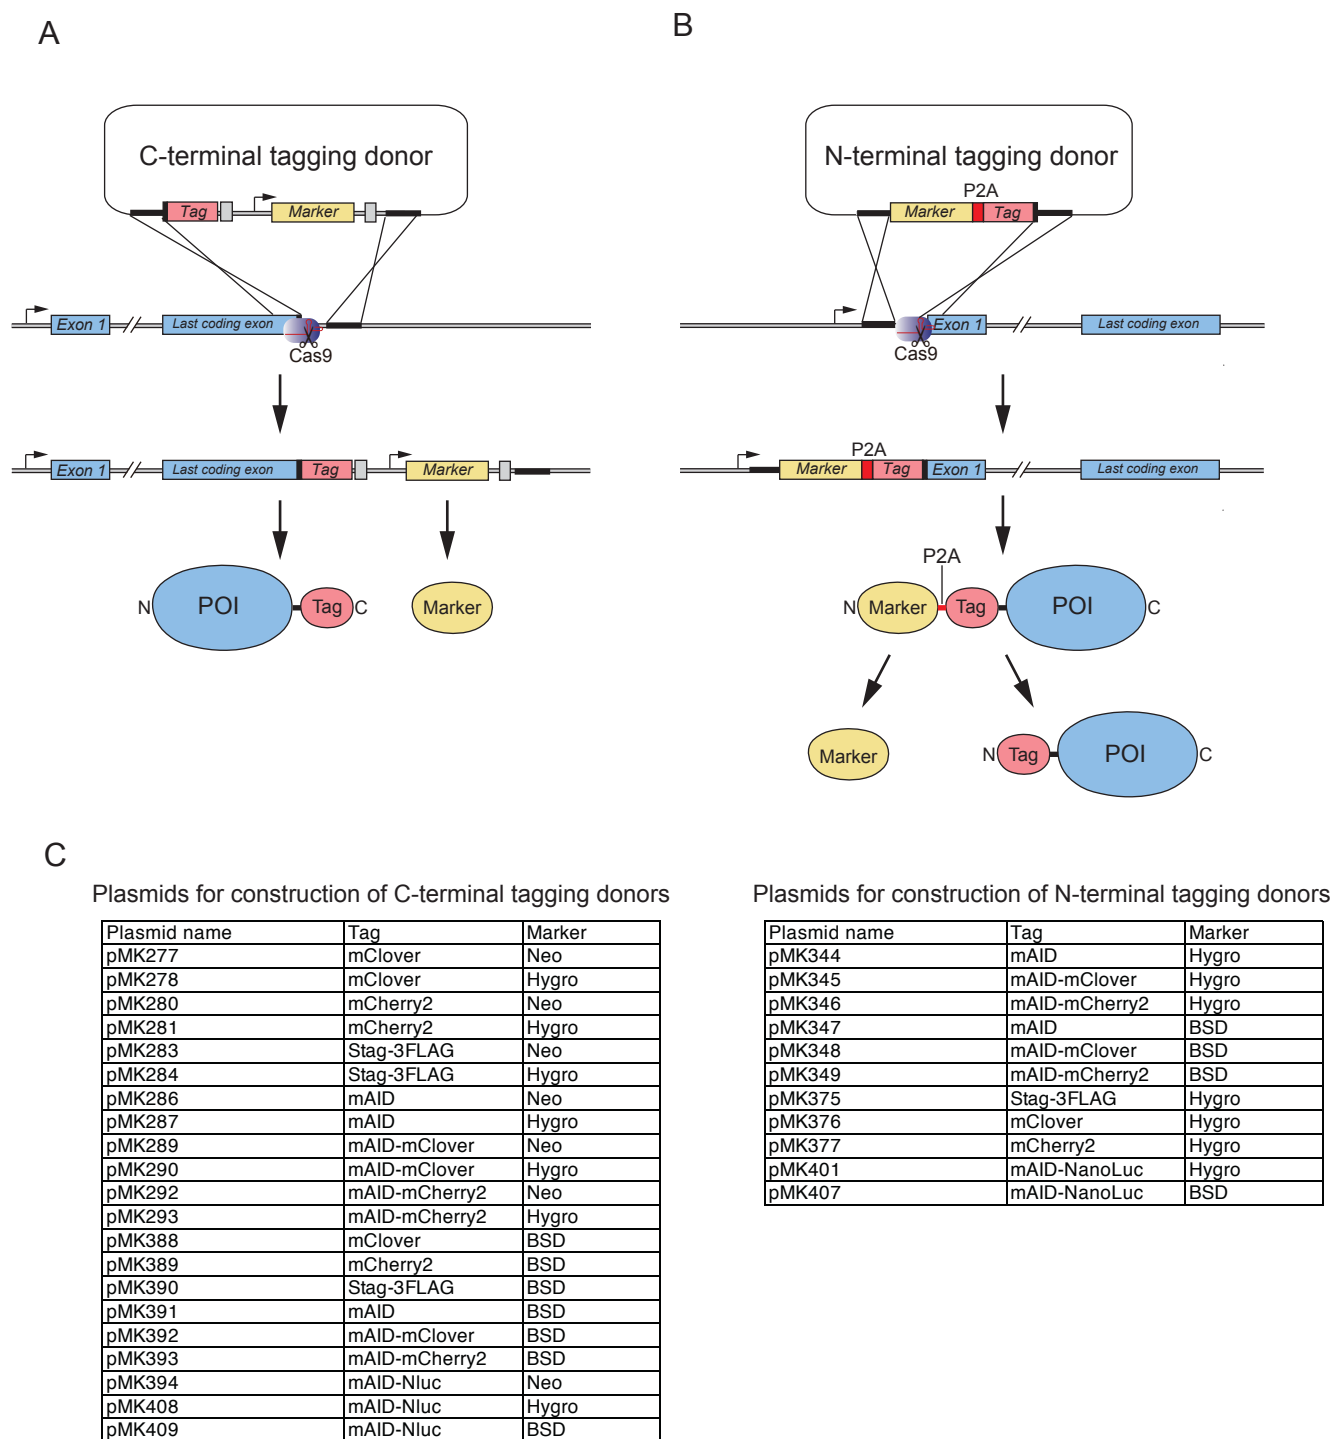

Figure 2



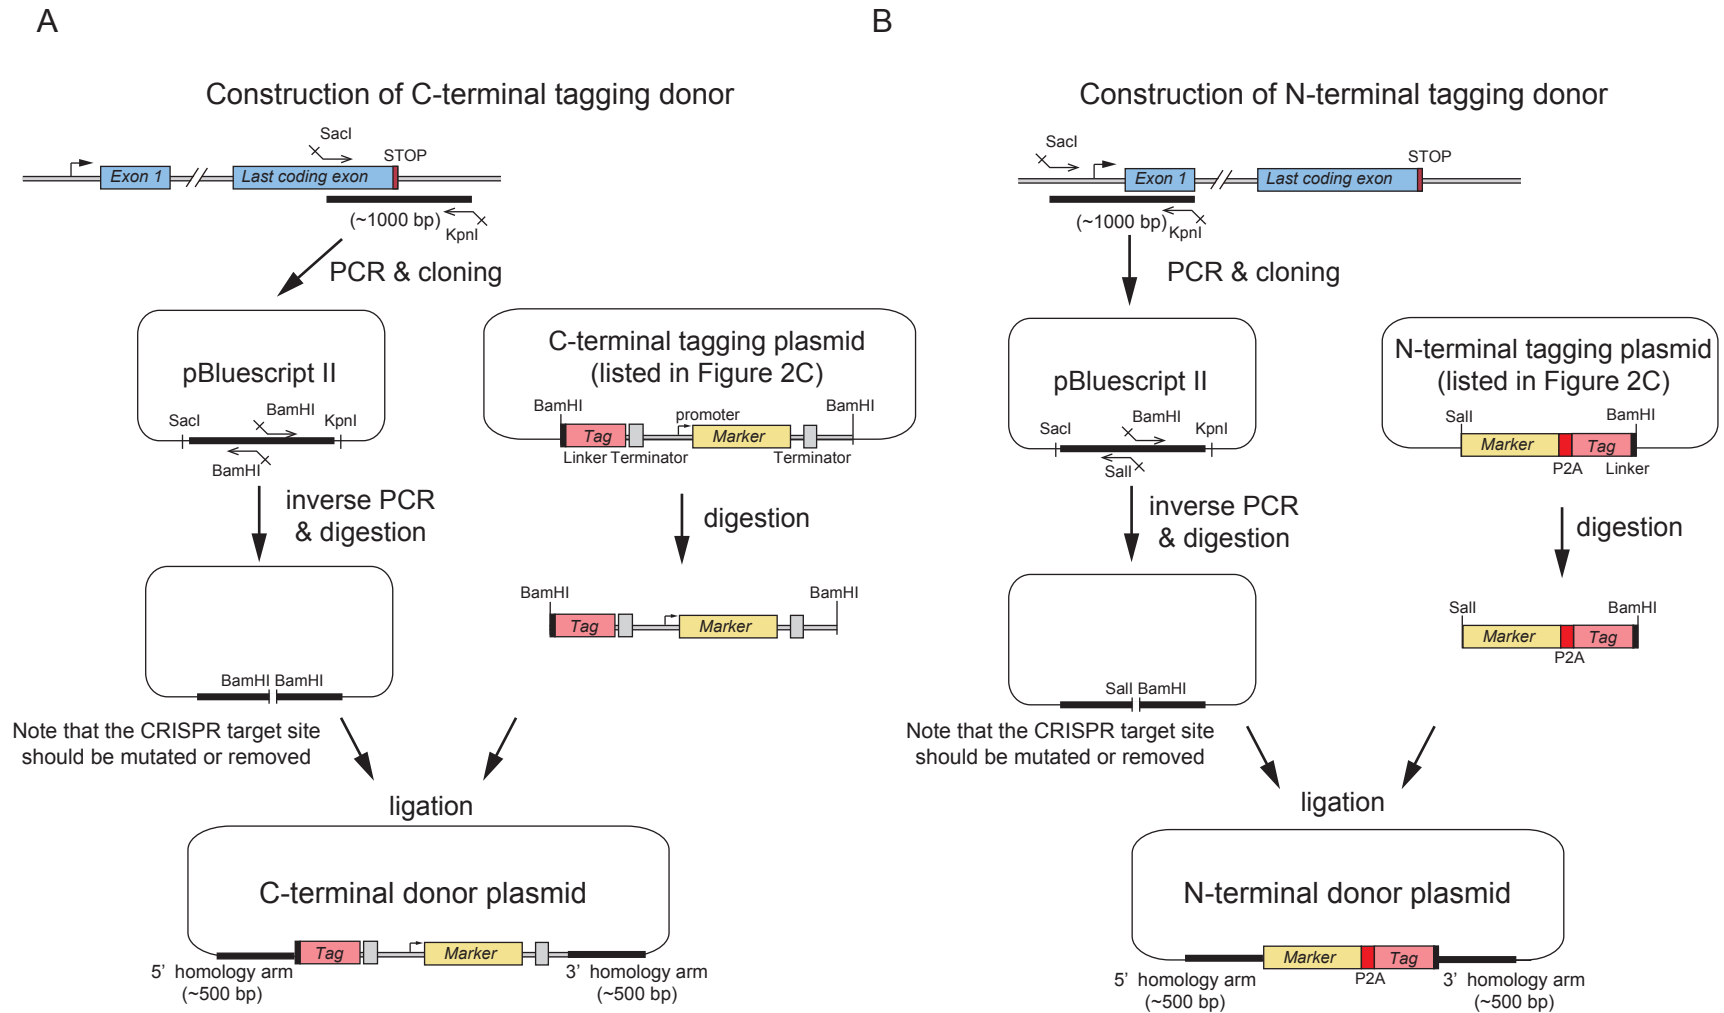

Figure 3

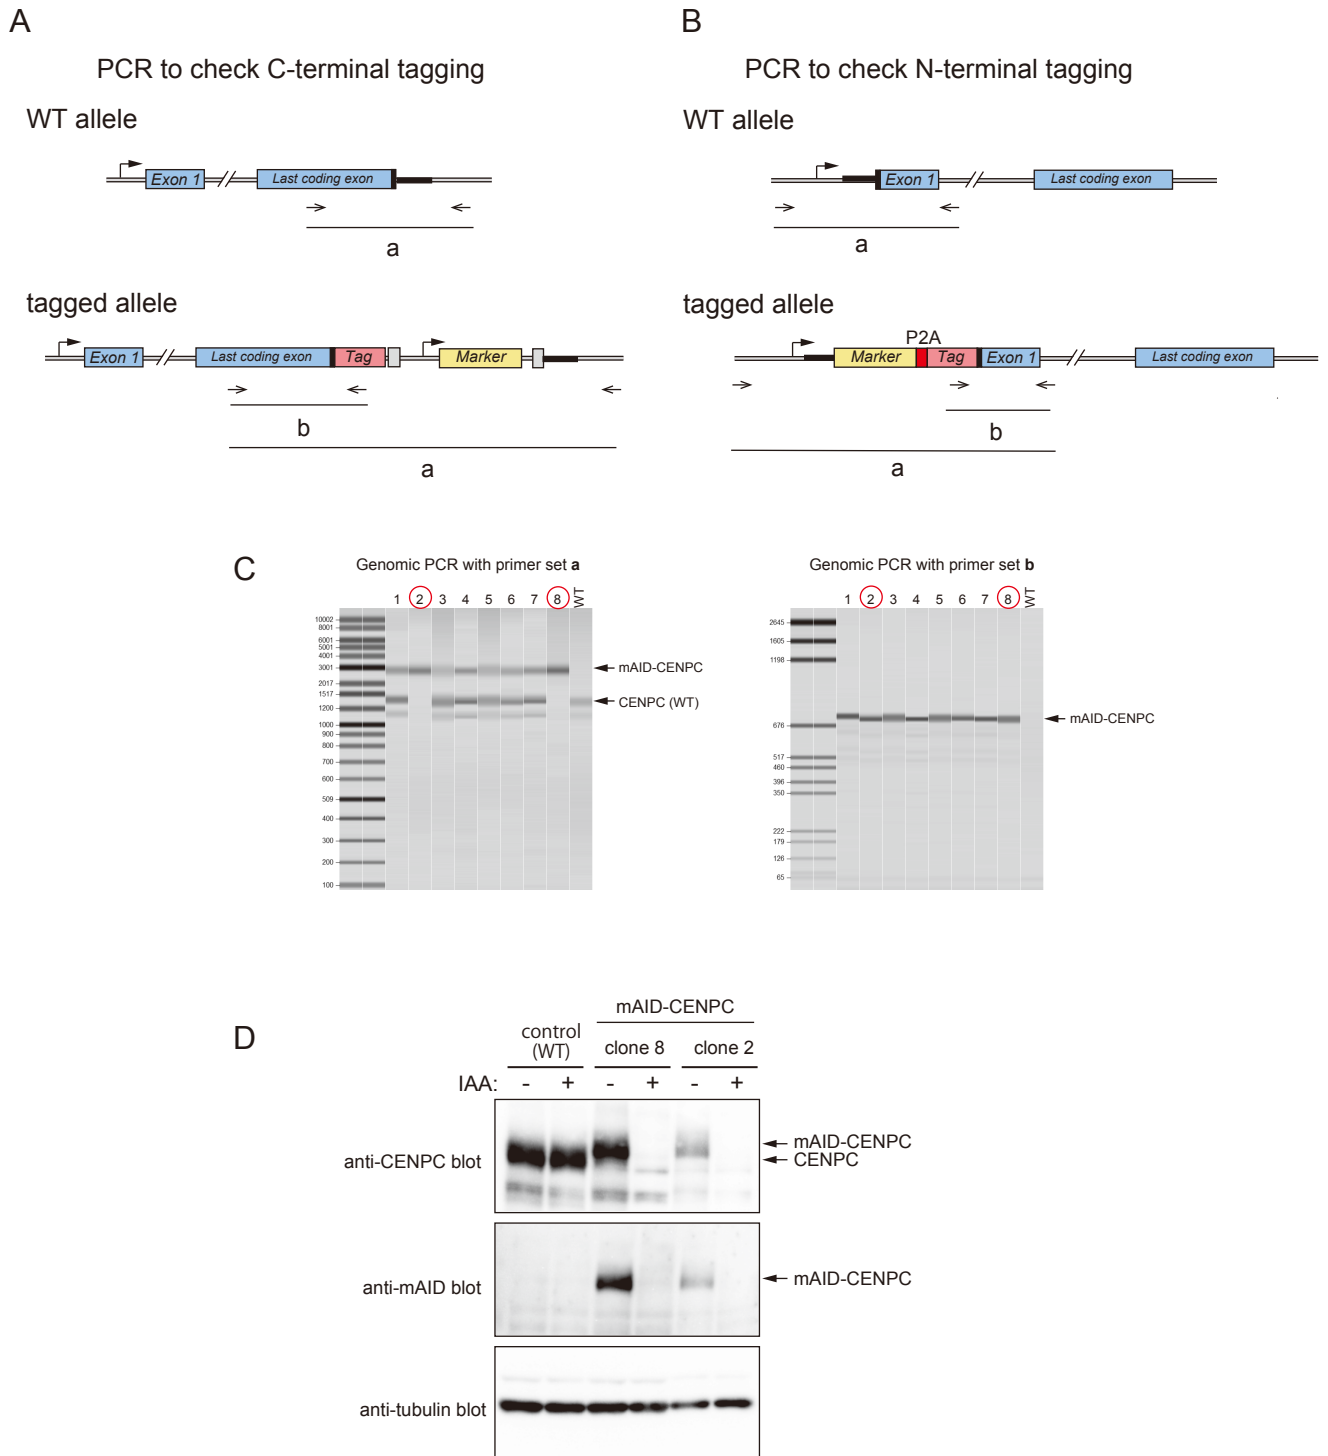

Figure 4

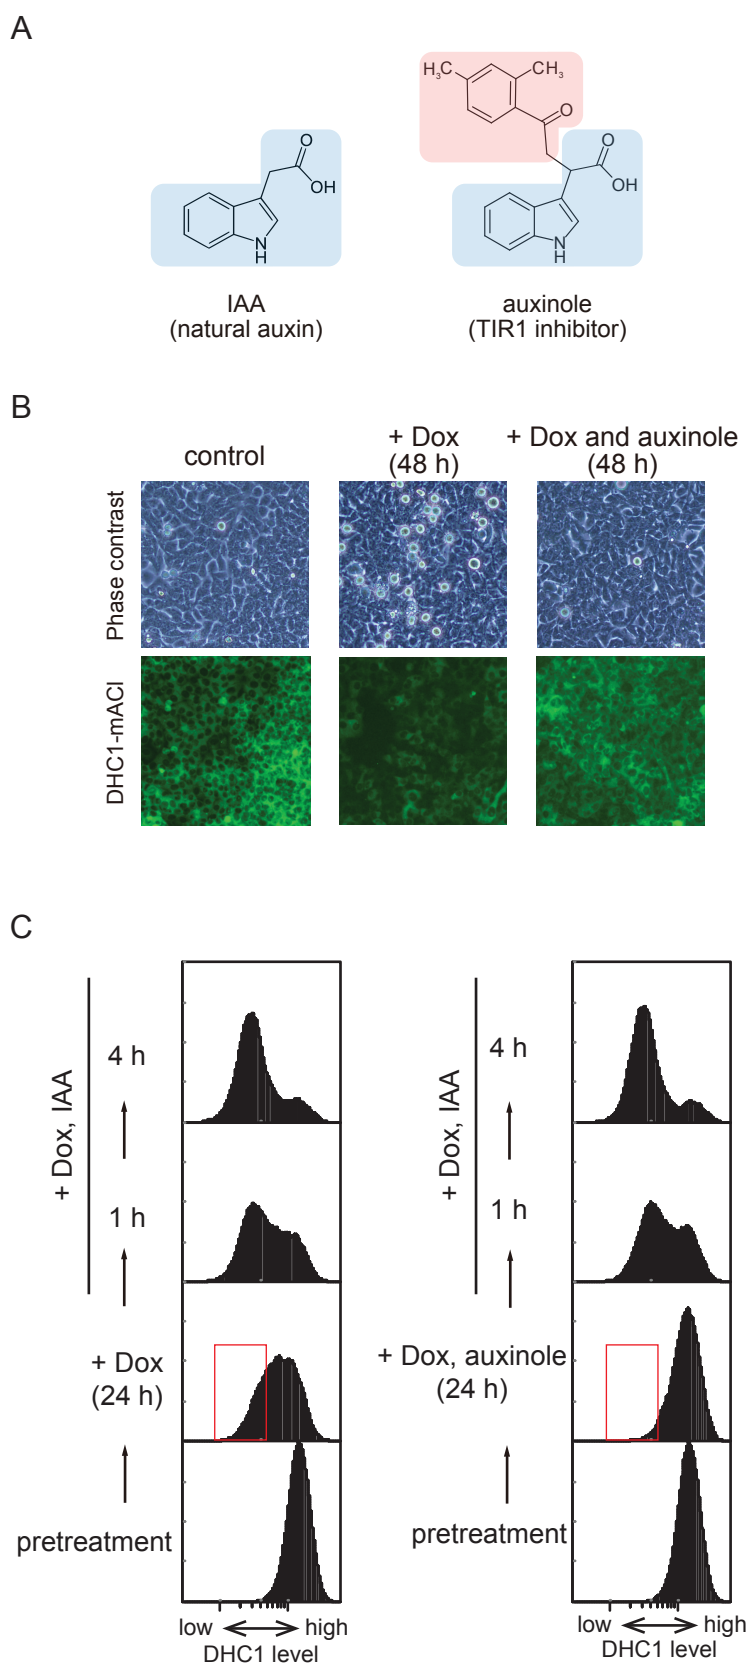

Figure 5

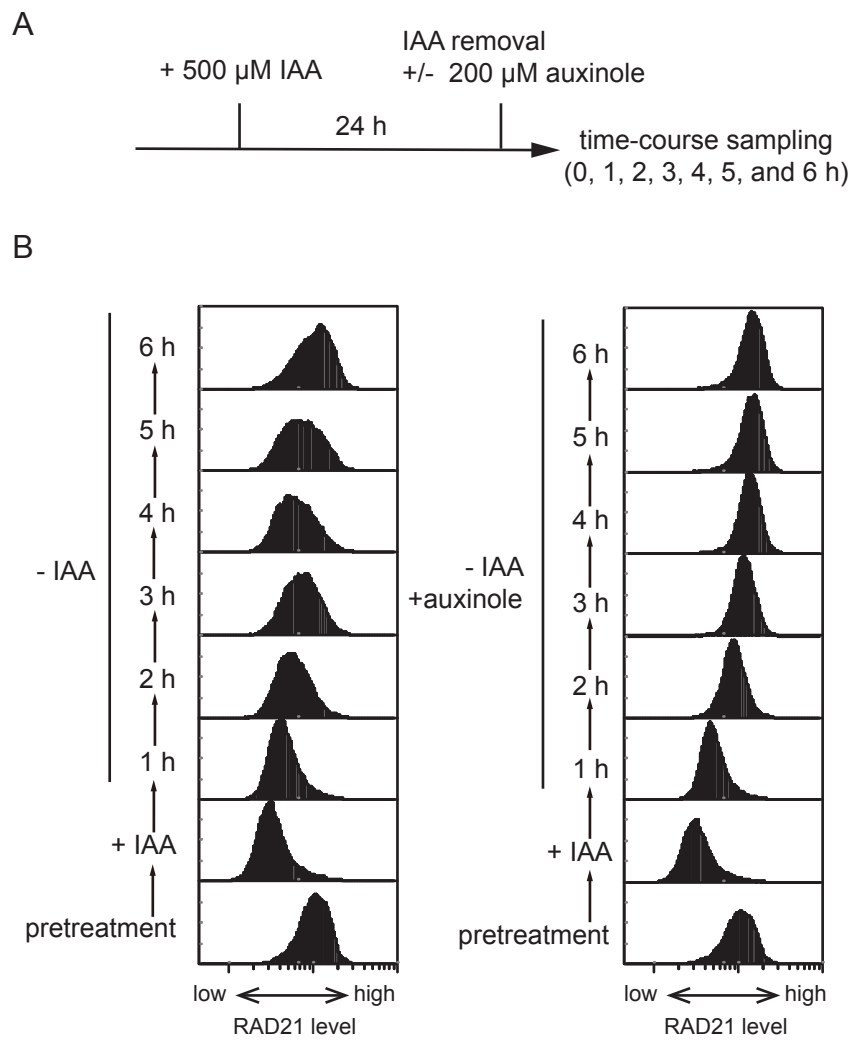

Figure 6
